# Supplementary material for: Replication and trafficking of a plant virus are coupled at the entrances of plasmodesmata
Source: PubMed Central journal article supplement — J Cell Biol. 2013 Jun 24;201(7):981–95. doi: 10.1083/jcb.201304003 (PMC3691464; doi:10.1083/jcb.201304003), 2013-06-24
Supplement: supp_jcb.201304003_JCB_201304003_sm.pdf [file supp_jcb.201304003_JCB_201304003_sm.pdf]

Tilsner et al., <http://www.jcb.org/cgi/content/full/jcb.201304003/DC1>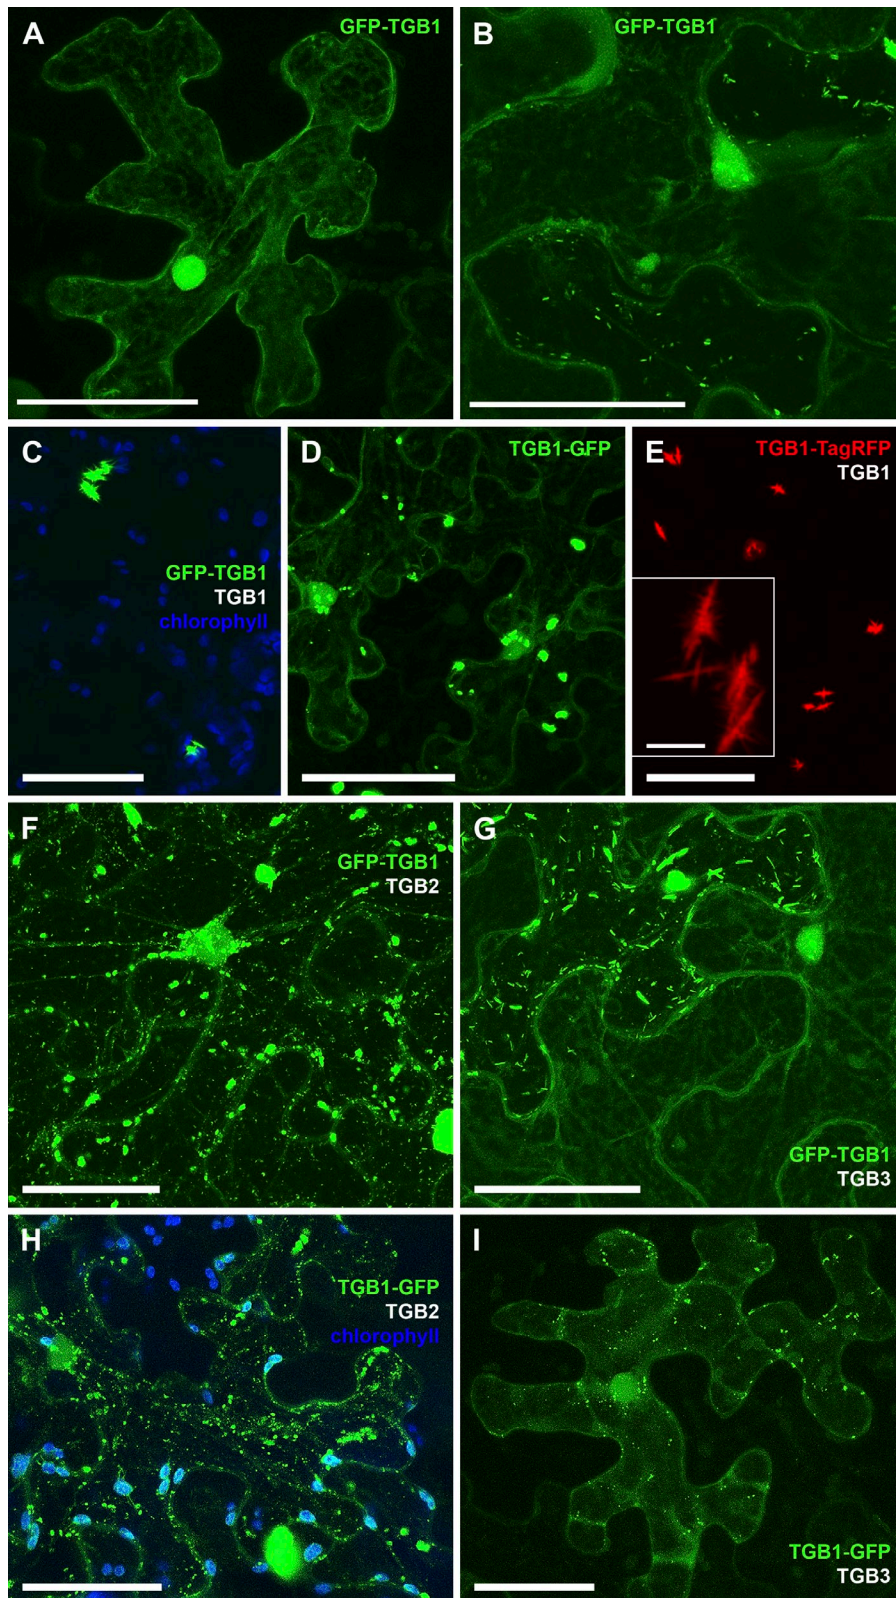

**Figure S1. TGB1 does not target PD by itself and is not recruited by TGB2 or TGB3 alone.** (A and B) GFP-TGB1 is cytoplasmic at 1 dpi (A) and starts to form aggregates at 2 dpi (B). (C) Presence of unfused TGB1 leads to aggregation of GFP-TGB1 but no PD are labeled. (D) TGB1-GFP labels aggregates and the cytoplasm. (E) TGB1-TagRFP forms aggregates in the presence of unfused TGB1 but does not localize to PD. Inset is a magnification of the needle-shaped TGB1-TagRFP aggregates also shown in the main image, to make their structure more apparent. (F and G) Neither TGB2 nor TGB3 alone can recruit GFP-TGB1 to PD. (H and I) Neither TGB2 nor TGB3 alone can recruit TGB1-GFP to PD. In C and H, chloroplast autofluorescence is shown in blue. All images are maximum projections of entire z stacks. Bars: [A–E [main image] and F–I] 50 µm; [E, inset] 10 µm.

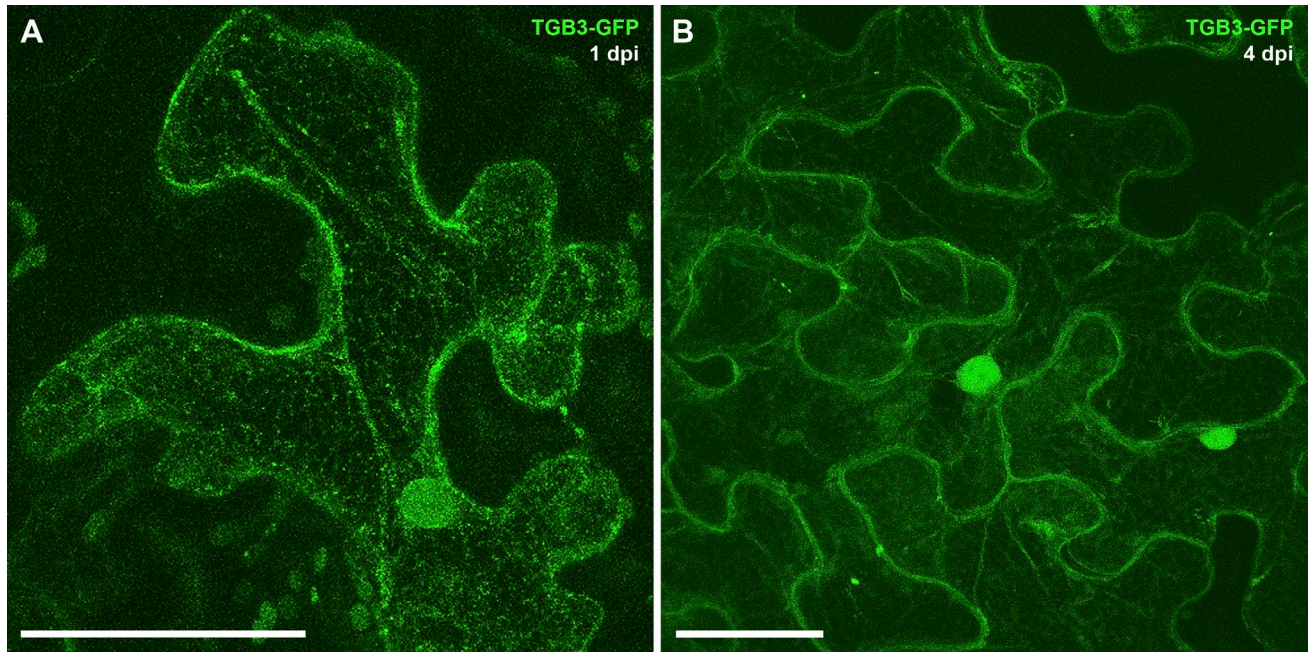

Figure S2. **TGB3-GFP does not target PD in the absence of unfused TGB3 protein.** (A and B) TGB3-GFP labels the ER at 1 dpi (A) and is mostly cytoplasmic at 4 dpi (B). (The fusion protein is unstable; Ju et al., 2008; Lee et al., 2010). Images are maximum projections of entire z stacks. Bars, 50  $\mu$ m.

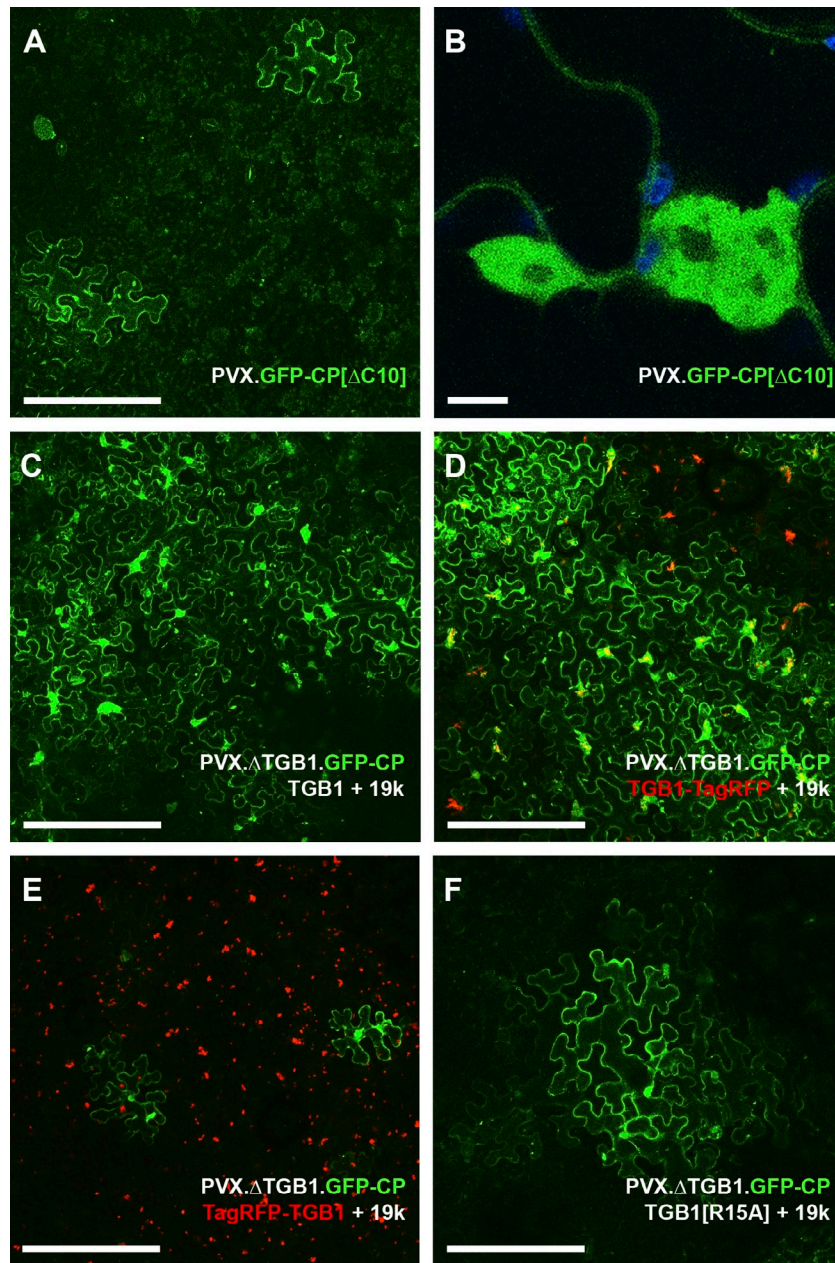

Figure S3. **PVX.GFP-CP[ $\Delta$ C10] phenotype and TGB1 movement complementations (3 dpi)**. White letters indicate coexpression of unfused proteins. 19k: ectopic silencing suppressor to compensate for potential effects of suppression deficiency in TGB1 mutants (Voinnet et al., 2003; Bayne et al., 2005). (A) PVX.GFP-CP[ $\Delta$ C10] is movement deficient. (B) PVX.GFP-CP[ $\Delta$ C10] forms perinuclear VRCs. (C) Unfused TGB1 rescues movement of TGB1-deficient PVX. (D) C-terminal TGB1-TagRFP also rescues movement of PVX. $\Delta$ TGB1.GFP-CP. (E) N-terminal TagRFP-TGB1 does not rescue PVX. $\Delta$ TGB1.GFP-CP movement. (F) TGB1[R15A] only partially restores PVX movement. In B, chloroplast autofluorescence is shown in blue. All images are maximum projections of entire z stacks except B, which is an individual z section. Bars: (A and C–F) 250  $\mu$ m; (B) 10  $\mu$ m.

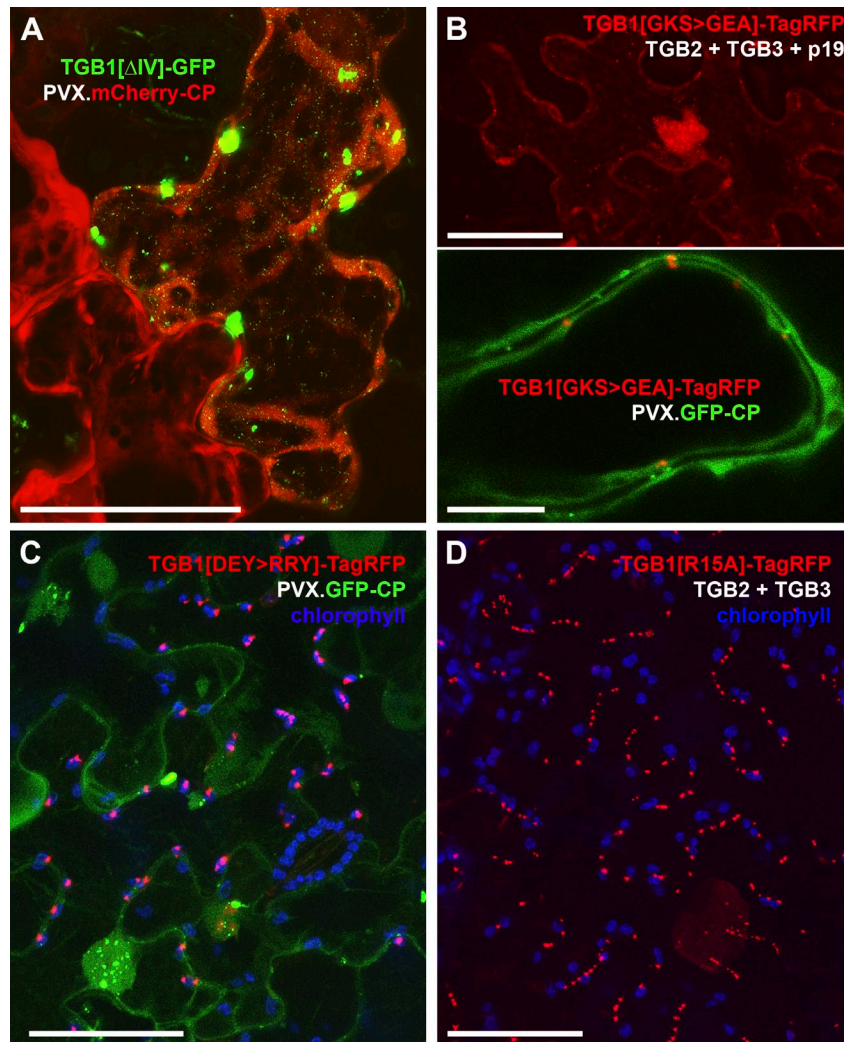

Figure S4. **PD recruitment of TGB1 mutants.** (A–C) TGB1[ $\Delta$ IV]-GFP, TGB1[GKS to GEA]-TagRFP, and TGB1[DEY to RRY]-TagRFP are not PD localized in infected cells or by TGB2/3. p19: Tomato bushy stunt virus silencing suppressor to boost expression (Voinnet et al., 2003). (D) TGB1[R15A]-TagRFP is recruited to PD by TGB2 and 3. In C and D, chloroplast autofluorescence is shown in blue. All images are maximum projections of entire z stacks, except B [bottom image], which is an individual z section. Bars: (A, B [top], C, and D) 50  $\mu$ m; (B, bottom) 10  $\mu$ m.

Table S1. Summary of PD targeting by combinations of TGB proteins

| TGB combination                                                                       | TGB2/3 PD caps | TGB1 inside PD | Other comments/description                                                                                                                                 |
|---------------------------------------------------------------------------------------|----------------|----------------|------------------------------------------------------------------------------------------------------------------------------------------------------------|
| <b>TGB1 PD targeting</b>                                                              |                |                |                                                                                                                                                            |
| FP-TGB1                                                                               | n.a.           | No             | Nuclear/cytoplasmic at low levels. At higher levels, forms elongated aggregates (Fig. S2, A and B)                                                         |
| FP-TGB1 + TGB1                                                                        | n.a.           | No             | Needle-shaped aggregates (Fig. S2 C)                                                                                                                       |
| TGB1-FP                                                                               | n.a.           | No             | Irregular aggregates (Fig. S2 D)                                                                                                                           |
| TGB1-FP + TGB1                                                                        | n.a.           | No             | Needle-shaped aggregates (Fig. S2 E)                                                                                                                       |
| <b>TGB2 PD targeting</b>                                                              |                |                |                                                                                                                                                            |
| FP-TGB2                                                                               | Yes            | n.a.           | Initially ER and PD; at higher expression levels, ER and granules (Fig. 3, A–C)                                                                            |
| FP-TGB2 + TGB2                                                                        | Yes            | n.a.           | No difference to FP-TGB2 alone (unpublished data)                                                                                                          |
| <b>TGB3 PD targeting</b>                                                              |                |                |                                                                                                                                                            |
| TGB3-FP                                                                               | No             | n.a.           | ER labeling at low expression levels and then fluorescence increasingly cytoplasmic (fusion unstable; Fig. S3, A and B; Ju et al., 2008; Lee et al., 2010) |
| TGB3-FP + TGB3                                                                        | Yes            | n.a.           | ER-associated punctae and PD caps (Fig. 3 D)                                                                                                               |
| <b>Influence of TGB2 on TGB3 PD targeting</b>                                         |                |                |                                                                                                                                                            |
| TGB3-FP + TGB3 + TGB2                                                                 | Yes            | n.a.           | Size and frequency of caps markedly increased compared to without TGB2 (Fig. 3 E)                                                                          |
| <b>PD recruitment of C-terminal TGB1 fusions by TGB2/3; effect of TGB2/TGB3 ratio</b> |                |                |                                                                                                                                                            |
| TGB1-FP + TGB2                                                                        | n.a.           | No             | No effect (Fig. S2 H)                                                                                                                                      |
| TGB1-FP + TGB3                                                                        | n.a.           | No             | No effect (Fig. S2 I)                                                                                                                                      |
| TGB1-FP + TGB2 + TGB3 (1:1:1)                                                         | n.a.           | Yes            | Aggregates and PD (Fig. 3 F)                                                                                                                               |
| TGB1-FP + TGB2 + TGB3 (10:10:1)                                                       | n.a.           | Yes            | Aggregates and PD (unpublished data)                                                                                                                       |
| TGB1-FP + TGB2/3 bicistronic (10:10:1)                                                | n.a.           | Yes            | Aggregates and PD (Fig. 3 G)                                                                                                                               |
| <b>PD recruitment of N-terminal TGB1 fusions by TGB2/3</b>                            |                |                |                                                                                                                                                            |
| FP-TGB1 + TGB2                                                                        | n.a.           | No             | TGB1 aggregates more dispersed (Fig. S2 F)                                                                                                                 |
| FP-TGB1 + TGB3                                                                        | n.a.           | No             | No effect (Fig. S2 G)                                                                                                                                      |
| FP-TGB1 + TGB2 + TGB3                                                                 | n.a.           | Yes            | Aggregates and PD (Fig. 3 H)                                                                                                                               |
| <b>PD recruitment of C-terminal TGB1 fusions by fusions of TGB2 and 3</b>             |                |                |                                                                                                                                                            |
| TGB1-RFP + GFP-TGB2 + TGB3                                                            | Yes            | No             | Unpublished data                                                                                                                                           |
| TGB1-RFP + GFP-TGB2 + TGB2 + TGB3                                                     | Yes            | Yes            | Fig. 4, A, C, and D                                                                                                                                        |
| TGB1-RFP + TGB1 + GFP-TGB2 + TGB3                                                     | Yes            | No             | Unpublished data                                                                                                                                           |
| TGB1-RFP + TGB2 + TGB3-GFP                                                            | No             | No             | Unpublished data                                                                                                                                           |
| TGB1-RFP + TGB2 + TGB3-GFP + TGB3                                                     | Yes            | Yes            | Fig. 4, B and E                                                                                                                                            |
| TGB1-RFP + TGB1 + TGB2 + TGB3-GFP                                                     | Yes            | Yes            | Weak TGB1-RFP labeling of PD (unpublished data)                                                                                                            |
| <b>PD recruitment of N-terminal TGB1 fusions by fusions of TGB2 and 3</b>             |                |                |                                                                                                                                                            |
| RFP-TGB1 + GFP-TGB2 + TGB3                                                            | Yes            | No             | Unpublished data                                                                                                                                           |
| RFP-TGB1 + GFP-TGB2 + TGB2 + TGB3                                                     | Yes            | Yes            | Unpublished data                                                                                                                                           |
| RFP-TGB1 + TGB2 + TGB3-GFP                                                            | No             | No             | Unpublished data                                                                                                                                           |
| RFP-TGB1 + TGB2 + TGB3-GFP + TGB3                                                     | Yes            | Yes            | Unpublished data                                                                                                                                           |

n.a., not applicable.

Table S2. **Oligonucleotide primers used in this study**

| Name                                         | Sequence (5' → 3')                                              |
|----------------------------------------------|-----------------------------------------------------------------|
| <b>Generation of 35S::PVX.GFP-CP[ΔC10]</b>   |                                                                 |
| PVX6809for                                   | CCTGAGCACAAATTCGCTGC                                            |
| dC10rev                                      | AGACGTAG <u>TTA</u> -GGTTGTTGTTCCAGTGATACGACC                   |
| dC10for                                      | ACTGGAACAACAACC- <u>TAA</u> CTACGTCTACATAACCGACGCC              |
| PVX7407rev                                   | GCACCCAGGCTTTACACTTTATG                                         |
| <b>TGB expression constructs</b>             |                                                                 |
| attB-TGB2for                                 | GGGGACAAGTTTGTACAAAAAAGCAGGCTGC-ATGTCCGCGCAGGGC                 |
| attB-TGB3for                                 | GGGGACAAGTTTGTACAAAAAAGCAGGCTGC-ATGGAAGTAAATACATATCTCAACGC      |
| attB-TGB3rev                                 | GGGGACCACTTTGTACAAGAAAGCTGGGT-ATGGAACTTAACCGTTCAACG             |
| attB-%TGB3rev                                | GGGGACCACTTTGTACAAGAAAGCTGGG- <u>TTA</u> ATGGAACTTAACCGTTCAACG  |
| attB-TGB1for                                 | GGGGACAAGTTTGTACAAAAAAGCAGGCTGC-ATGGATATTCTCATCAGTAGTTGAAAAG    |
| attB-TGB1rev                                 | GGGGACCACTTTGTACAAGAGAAAGCTGGGTC-TGGCCCTGCGCGG                  |
| attB-%TGB1rev                                | GGGGACCACTTTGTACAAGAGAAAGCTGGGTC- <u>CTA</u> TGGCCCTGCGCGG      |
| <b>TGB1[ΔIV] mutagenesis</b>                 |                                                                 |
| ΔIVfor                                       | AGCCTAGAGCCCCAC-AGGAAAGTGGCAGATTGATAGCTG                        |
| ΔIVrev                                       | ATCTGCCACTTTCCT-GTGGGGCTCTAGGCTAAACTCC                          |
| <b>TGB1[GKS to GEA] mutagenesis</b>          |                                                                 |
| KSEAfor                                      | CCGGT <u>GAG</u> CCACAGCCCTAAGGAAGTTG                           |
| KSEArev                                      | GGCTGTGG <u>CCT</u> ACCGGCTCCGG                                 |
| <b>TGB1[DEY to RRY] mutagenesis</b>          |                                                                 |
| DERRfor                                      | CGCAATCCTCC <u>GTC</u> GGTATACTTTGGACAAC                        |
| DERRrev                                      | GTCCAAAGTATAC <u>CGAC</u> GGAGGATTGCGAAG                        |
| <b>TGB1[R15A] mutagenesis</b>                |                                                                 |
| R15Afor1                                     | GTTTAAAAGTTTAGGTTATTCT <u>GCA</u> ACTTCCAAATC                   |
| R15Afor2                                     | ATGGATATTCTCATCAGTAGTTTAAAAGTTTAGGTTATTCT <u>GCA</u> AC         |
| <b>GFP-CP and CP expression</b>              |                                                                 |
| attB-CPfor                                   | GGGGACAAGTTTGTACAAAAAAGCAGGCTGC-ATGTCAGCACCCGCGAGCACAAACAC      |
| attB-CPrev                                   | GGGGACCACTTTGTACAAGAGAAAGCTGGG- <u>TTA</u> TGGTGGTGGTAGAGTGACAA |
| <b>165k<sup>(1-997)</sup>-GFP expression</b> |                                                                 |
| attB-165kfor                                 | GGGGACAAGTTTGTACAAAAAAGCAGGCTGC-ATGGCCAAGGTGCGCG                |
| attB-165kHELrev                              | GGGGACCACTTTGTACAAGAGAAAGCTGGGTC-GTACTCCCTGAGTGCTTGTCTCTC       |

Percentage signs denote primers with stop codons. Gateway adapters and gene-specific sequences, as well as gene-specific sequences flanking deletions, are separated by dashes. Relevant mutagenic nucleotides and stop codons are underlined. for, forward; rev, reverse.

## References

- Bayne, E.H., D.V. Rakitina, S.Y. Morozov, and D.C. Baulcombe. 2005. Cell-to-cell movement of potato potyvirus X is dependent on suppression of RNA silencing. *Plant J.* 44:471–482. <http://dx.doi.org/10.1111/j.1365-313X.2005.02539.x>
- Ju, H.-J., C.M. Ye, and J. Verchot-Lubicz. 2008. Mutational analysis of PVX TGBp3 links subcellular accumulation and protein turnover. *Virology.* 375:103–117. <http://dx.doi.org/10.1016/j.virol.2008.01.030>
- Lee, S.-C., C.-H. Wu, and C.-W. Wang. 2010. Traffic of a viral movement protein complex to the highly curved tubules of the cortical endoplasmic reticulum. *Traffic.* 11:912–930. <http://dx.doi.org/10.1111/j.1600-0854.2010.01064.x>
- Voinnet, O., S. Rivas, P. Mestre, and D. Baulcombe. 2003. An enhanced transient expression system in plants based on suppression of gene silencing by the p19 protein of tomato bushy stunt virus. *Plant J.* 33:949–956. <http://dx.doi.org/10.1046/j.1365-313X.2003.01676.x>
